1  
2  
3  
4  
5  
6  
7  
8  
9  
10  
11  
12  
13  
14  
15  
16  
17  
18  
19  
20  
21  
22  
23  
24  
25  
26  
27  
28  
29  
30  
31  
32  
33  
34  
35  
36  
37  
38  
39  
40  
41  
42  
43  
44  
45

**Title: A versatile, high-efficiency platform for CRISPR-based gene activation**

**Authors and Affiliation**

Amy J. Heidersbach<sup>1\*#</sup>, Kristel M. Dorighi<sup>1\*</sup>, Javier A. Gomez<sup>2</sup>, Ashley M. Jacobi<sup>2</sup>, Benjamin Haley<sup>1#</sup>

<sup>1</sup>Department of Molecular Biology, Genentech Inc., South San Francisco, CA, USA.

<sup>2</sup>Integrated DNA Technology Inc. Coralville, IA, USA.

\*These authors contributed equally to this work.

#Correspondence to: heidersbach.amy@gene.com or haley.benjamin@gene.com

**Abstract**

CRISPR-mediated transcriptional activation (CRISPRa) is a powerful technology for inducing gene expression from endogenous loci with exciting applications in high throughput gain-of-function genomic screens and the engineering of cell-based models. However, current strategies for generating potent, stable, CRISPRa-competent cell-lines present limitations for the broad utility of this approach. Here, we provide a high-efficiency, self-selecting CRISPRa enrichment strategy, which combined with piggyBac transposon technology enables rapid production of CRISPRa-ready cell populations compatible with a variety of downstream assays. We complement this with a new, optimized guide RNA scaffold that significantly enhances CRISPRa functionality. Finally, we describe a novel, synthetic guide RNA tool set that enables transient, population-wide gene activation when used with the self-selecting CRISPRa system. Taken together, this versatile platform greatly enhances the potential for CRISPRa across a wide variety of cellular contexts.

**Main**

Recent advances in genome engineering technology have enabled unprecedented opportunities for exploring the consequences of altered gene function or expression in a variety of model systems.<sup>1,2</sup> Driving many of these efforts has been the adaptation of the microbial CRISPR/Cas9 system for use in eukaryotic organisms<sup>3</sup>. Cas9's defining feature, as an easily programmable RNA-directed double stranded DNA (dsDNA) nuclease, has inspired the creation of genome-scale perturbation libraries and subsequent loss-of-function screens across hundreds of human cell lines<sup>4-6</sup>. These screens have proven invaluable for uncovering genotype and cell lineage-specific gene dependencies, which continue to inform basic as well as clinical research efforts<sup>7</sup>.

Cas9 can also be engineered for expanded use beyond the creation of targeted dsDNA breaks. The fusion of transcriptional repressor or activator domains to a nuclease-dead form of Cas9 (dCas9), enables CRISPR-mediated transcriptional interference (CRISPRi) or activation (CRISPRa), respectively<sup>8-10</sup>. CRISPRa is a compelling technology for the activation of endogenous gene expression in disease models or gain-of-function screens<sup>11-13</sup>. A host of

46 activator domains and transgene expression systems have been engineered to enable the  
47 production of CRISPRa-competent cells<sup>14</sup>. However, current strategies for engineering CRISPRa  
48 transgenic cell-lines are inefficient, prone to silencing, and often necessitate a labor-intensive  
49 single-cell cloning process. Gene and cell line-dependent variability pose further limits on the  
50 scalability of CRISPRa.

51  
52 Here, we provide a comprehensive platform based on the Synergistic Activation Mediator  
53 (SAM)<sup>13</sup> CRISPRa concept, that takes advantage of a self-selection mechanism to create uniform,  
54 potent, and stable CRISPRa-competent cell populations without the need for clonal selection. In  
55 addition, we demonstrate the effectiveness of a new SAM-compatible single-guide RNA (sgRNA)  
56 variant that both improves the function of sub-optimal sgRNAs and enables activity from sgRNAs  
57 found to be inactive with earlier-generation scaffolds. We show that this new sgRNA format is not  
58 only capable of facilitating stable gene expression, but that it can also be used for transient target  
59 activation through a novel, chemically-synthesized guide RNA tool set. Altogether, this new, user-  
60 friendly platform maximizes the potential for CRISPRa across a breadth of cell-based contexts  
61 and genetic loci.

62  
63  
64 **Results**

65  
66 **A self-selecting CRISPRa strategy for the rapid generation of stable, high-efficiency**  
67 **CRISPRa cell populations**  
68

69 Several dCas9-activator concepts have been described<sup>12</sup>. In pilot experiments, we observed  
70 consistent evidence of target activation with the Synergistic Activation Mediator (SAM) system  
71 (data not shown), and selected this platform for optimization studies. The SAM system poses a  
72 challenge, however, owing to the size and number of discrete elements that must be introduced  
73 in order to create a stable CRISPRa-ready cell population. These include a dCas9-VP64 fusion  
74 protein, an MCP- (MS2 coat protein) p65-HSF1 co-activator fusion protein (MPH), and any  
75 number of selection markers. Combined, these components and their associated regulatory  
76 sequences exceed the conventional limit for efficient lentiviral packaging<sup>15</sup>, often necessitating a  
77 multi-vector delivery strategy<sup>13,16</sup>. The piggyBac transposon system<sup>17</sup>, on the other hand, allows  
78 for both a higher cargo capacity and the incorporation of multiple transgene cassettes within a  
79 single vector. PiggyBac-based strategies have been utilized for CRISPRa-based cell line  
80 generation<sup>18,19</sup>, but, similar to lentivirus, its use results in random genomic integration and  
81 functional heterogeneity within the cell population. The resulting low efficiency populations are  
82 often incompatible with demanding applications like functional genomic screening without the  
83 further derivation and characterization of high efficiency clones. Due to the laborious and time-  
84 consuming nature of this process we aimed to develop a simple and efficient bulk selection  
85 method to enrich for stable, uniform, and potent CRISPRa-expressing cell populations.

86  
87 To this end, we designed a series of multi-component CRISPRa piggyBac vectors which  
88 employed individual selection strategies for the enrichment of transgenic cells (Fig. 1a). In each  
89 context, expression of the CRISPRa activator elements was driven by a human EF1 $\alpha$  promoter,  
90 and this was complemented by a distinct mechanism for the transcription of a co-expressed

91 puromycin resistance gene (*puro<sup>r</sup>*). Similar to previous studies, we created a *dual promoter*  
92 selection vector<sup>19</sup> (Fig. 1a-top row) where *puro<sup>r</sup>* was driven by an independent promoter (PGK)  
93 and a *single transcript* vector<sup>20</sup> where *puro<sup>r</sup>* was transcriptionally linked to the CRISPRa machinery  
94 (Fig. 1a-middle row). The theoretical selection pressure exerted by these strategies should be on  
95 maintaining transgene genomic integration in the case of the dual promoter vector and on  
96 sustained transgene expression in the case of the single transcript system (Fig. 1a-right column).  
97 As a readout for CRISPRa function we also incorporated a GFP reporter downstream of a self-  
98 activating (SA) promoter, which could be activated only in the presence of functional CRISPRa  
99 machinery and a co-expressed SA-targeting guide RNA. Building on the self-activating concept,  
100 we devised a third strategy, which we term *CRISPRa selection* (CRISPRa-sel), where the *puro<sup>r</sup>*  
101 gene is driven by the self-activating promoter and linked to the GFP reporter (Fig. 1a-bottom row).  
102 Unlike the dual promoter or single transcript approaches, in the CRISPRa-sel context there is an  
103 absolute requirement for each cell to maintain functional CRISPRa in order to survive in the  
104 presence of puromycin.

105  
106 We evaluated the relative efficiency of each selection strategy in the human K562 cell line.  
107 Following puromycin selection, the individual populations were infected with lentiviral vectors  
108 expressing SAM-compatible sgRNAs targeting the promoter proximal regions of five cell surface  
109 receptor genes (Extended Data Fig. 1a). Quantitative RT-PCR (qRT-PCR) data from each  
110 condition revealed consistently-improved gene activation with the CRISPRa-sel system relative  
111 to the other formats (Fig.1b). We further used flow cytometry to quantitatively assess cell surface  
112 protein expression on an individual cell level (Fig.1c,d; Extended Data Fig. 1b). This analysis  
113 further demonstrated a dramatic enhancement in gene activation with the CRISPRa-sel system  
114 both in terms of absolute protein expression, by way of normalized median fluorescence intensity  
115 (MFI), and percent positive-stained cells. While the dual promoter and single transcript systems  
116 showed highly heterogenous populations with only a small number of active cells, the CRISPRa-  
117 sel strategy resulted in a substantial improvement in the proportion of active cells, which in some  
118 cases achieved near population-wide activation (i.e. PD-L1 and CD2). To confirm the broad  
119 applicability of our findings, we expanded our analysis to two additional, unrelated human cell  
120 lines (Extended Data Fig. 1 c,d) where similar trends were observed. Importantly, potent  
121 endogenous gene activation with the CRISPRa-sel format suggested the self-activating circuit did  
122 not interfere with gene expression induced by separate, lentivirally-delivered sgRNAs.

123  
124 In addition to endogenous target activation, we evaluated whether our integrated  
125 CRISPRa-dependent GFP reporter was effective at identifying CRISPRa-competent cells. To our  
126 surprise, we found that GFP intensity did not reliably correlate with endogenous target gene  
127 activation across the tested selection formats and cell lines (Extended Data Fig. 2). Although a  
128 trend towards correlation was observed for the dual promoter format (Extended Data Fig. 2a-left),  
129 there was high variability in the single transcript and CRISPRa-sel contexts (Extended Data Fig.  
130 2a-center, right). To further evaluate the relationship between GFP expression and endogenous  
131 gene activation in the CRISPRa-sel context, we expanded our analysis to a second endogenous  
132 target gene (CD2) (Extended Data Fig. 2b) and observed similarly weak correlations. Despite  
133 this observation when analyzed in bulk, we wanted to determine if GFP expression could be used  
134 to facilitate the isolation of high-functioning single cell clones. We engineered the CRISPRa-sel

135 system into four unrelated cell lines and following puro selection we sorted cell populations based  
136 on high, medium, or low GFP expression via fluorescence activated cell sorting (FACS) (Extended  
137 Data Fig. 2c-d). From these sorted populations, single-cell clonal lines were derived, and upon  
138 expansion were transduced with sgRNAs targeting distinct endogenous genes (PD-L1, CXCR4)  
139 or a non-targeting control. Interestingly, while relative GFP expression levels were maintained in  
140 the clones post-expansion (Extended Data Fig. 2c-left), there was no clear relationship between  
141 reporter expression and endogenous target activation in three of four cell lines evaluated  
142 (Extended Data Fig. 2c-center/right). These data suggest that, in the context of the CRISPRa-sel  
143 system, selection with a CRISPRa dependent fluorescent reporter is not a broadly applicable  
144 strategy for further enrichment of CRISPRa-competent populations, beyond what is achieved with  
145 puromycin selection. While other groups have reported successful enrichment with fluorescent  
146 CRISPRa responsive reporters<sup>20</sup>, our data suggest such strategies are potentially more useful in  
147 the context of low efficiency systems like the dual promoter or single transcript formats where the  
148 number of active cells in the population is low and the functional difference between active and  
149 inactive cells is high. On the other hand, GFP-based reporters may not be sensitive enough to  
150 discriminate effectively between cells within more uniform CRISPRa-sel derived cell populations.  
151 Therefore, we focused on antibiotic-selected populations for the remainder of our platform  
152 optimization efforts.

153  
154

### 155 **SAM guide RNA scaffold optimization for enhanced CRISPRa activity**

156

157 Subtle changes in scaffold sequence and structure have been shown to affect guide RNA  
158 function<sup>13,16,21,22</sup> and we reasoned that the conventional SAM-2.0 scaffold could be re-engineered  
159 to improve activity. The MPH activator utilized by the SAM system binds to two separate MS2  
160 aptamers within the SAM-2.0 sgRNA; one in the tetraloop and one in stem loop two (Extended  
161 Data Fig. 3a). Focusing on the tetraloop, we used rational design to create several new SAM-  
162 compatible scaffold variants (Extended Data Fig. 3a-b, Fig. 2a). Previous reports have indicated  
163 that Pol-III-based guide expression can be enhanced by removing a poly U tract in the tetraloop,  
164 which can serve as a premature transcriptional termination sequence.<sup>21,22</sup> (Extended Data Fig. 3b  
165 [GNE-1]). Additionally, we hypothesized that increasing the stability or accessibility of the MS2  
166 aptamer segment within the tetraloop could encourage greater associations with MPH complexes,  
167 further improving CRISPRa efficiency. To explore these possibilities, we coupled poly U deletion  
168 with an alternate, GC-rich stem extension sequence proximal to the MS2 aptamer (Extended Data  
169 Fig. 3 [GNE-2])<sup>21</sup>. Finally, we combined both stem extension features with the removal of a bulge  
170 sequence directly adjacent to the MS2 aptamer (Extended Data Fig. 3 [GNE-3]).

171

172 To evaluate the relative efficiency of these scaffolds, we lentivirally-transduced CRISPRa-  
173 sel engineered K562 populations with sgRNAs targeting three endogenous genes (PD-L1, CD14,  
174 or KDR) in either the SAM-2.0 scaffold format or one of our three novel variants (Extended Data  
175 Fig. 3c). By flow cytometry, higher target expression was observed with several of the new  
176 scaffold variants, but GNE-3 showed the most consistent improvement over 2.0, both in terms of  
177 gene product levels (normalized MFI) and the percentage of activated cells across the population.  
178 We subsequently expanded our comparison of the 2.0 and GNE-3 scaffolds to include six cell

179 surface receptor genes, using five unique sgRNAs per gene, to account for gene and spacer-  
180 specific variability. Analysis of target transcript (qRT-PCR) and protein (flow cytometry)  
181 expression (Fig. 2b-c; Extended Data Fig. 4a-b) revealed a broad enhancement of target  
182 activation with the GNE-3 scaffold versus the 2.0 backbone, with several sequences achieving  
183 between 5-10-fold improved gene induction with the GNE-3 variant. To confirm that the GNE-3  
184 scaffold was beneficial in other cell contexts, we expanded our analysis to two additional cell lines.  
185 As before, we found activation of PD-L1, as measured by cell surface staining in 293T and Jurkat  
186 cells, (Extended Data Fig. 4c) was consistently higher with the GNE-3 scaffold. Taken together  
187 these data suggest that the GNE-3 scaffold improves both the breadth and magnitude of gene  
188 activation across a variety of spacer, target and cellular contexts. In addition, we found that  
189 relative target gene activation was largely consistent when comparing transcript level or cell  
190 surface protein stain (Extended Data Fig. 4d) for most targets, and therefore chose to move  
191 forward with validated flow cytometry assays for subsequent experiments owing to the  
192 quantitative nature of this assay at both the population and individual cell levels.

193

### 194 **CRISPRa-sel promoter optimization and evaluation in a panel of human cell lines**

195

196 While the combination of our CRISPRa-sel system with the GNE-3 scaffold demonstrated  
197 improvement in overall CRISPRa efficiency, we continued to observe variable target activation  
198 across cell lines (Fig. 3a-c [EF1 $\alpha$ ], Extended Data Fig. 5 [EF1 $\alpha$ ]). The strength of Pol-II promoters,  
199 which drive expression of the CRISPRa machinery, can differ dramatically across cell types<sup>23</sup>  
200 potentially contributing to the context-dependent efficacy of CRISPRa (Fig. 3a). To evaluate how  
201 promoter use impacts the efficiency of the CRISPRa-sel system, we engineered a panel of three  
202 cell lines (K562, 293T and Jurkat) with the original EF1 $\alpha$ -based CRISPRa-sel vector or versions  
203 that incorporated three distinct cytomegalovirus (CMV)-derived Pol-II promoter variants (CBh,  
204 CMV, and CAG) (Fig. 3a-c.; Extended data 5) to drive expression of the activator machinery.

205

206 Attempts to engineer CRISPRa-sel populations were successful in all but one cell line  
207 context (Jurkat + CMV-CRISPRa-sel) (Fig. 3b), in which only a low number of slow growing clones  
208 were recovered following puromycin selection. To evaluate the relative efficacy of each promoter,  
209 populations were transduced with GNE-3 sgRNAs targeting PD-L1 or CD2. Unlike the more  
210 heterogeneous activation observed with the EF1 $\alpha$ , CBh, and CMV promoters, the CAG promoter  
211 induced distinctly uniform and potent gene expression for each of the tested cell lines and targets  
212 (Fig. 3b-c). We expanded our assessment to include three additional endogenous targets (CD14,  
213 CXCR4 and CD69) and saw comparable results (Extended Data 5a-b). Importantly, this  
214 demonstrated that population-wide CRISPRa was achievable with limited cell culture  
215 manipulation steps beyond bulk antibiotic selection.

216

217 In order to confirm the broad utility of the CAG-CRISPRa-sel and GNE-3-sgRNA system,  
218 we engineered an additional panel of ten commonly used cell lines (Fig. 3d-f). After bulk selection  
219 of the CAG-CRISPRa-sel transgenic cell lines, introduction of a PD-L1-specific sgRNA led to  
220 strong, uniform target induction (~79-99% of the cell population) (Fig. 3e-f). We then expanded  
221 this analysis to four additional target genes per cell line, and while we observed some context-  
222 dependent variability for individual genes, robust activation in  $\geq 75\%$  of the cell population was



223 seen in the majority of conditions. Notably, beyond activating genes with little or no background  
224 expression, we were able to induce population-wide upregulation of genes with high basal  
225 expression (Fig. 3e [H358<sup>24</sup>],[RKO<sup>25</sup>]). Taken together these data indicate that the CAG-  
226 CRISPRa-sel system in conjunction with the GNE-3 scaffold greatly enables the utility of stable  
227 CRISPRa across a breadth of cell backgrounds and target genes.

228

### 229 **Optimized, multi-format synthetic guide RNAs for transient CRISPRa**

230

231 Synthetic guide RNAs can be generated quickly and have proven effective for Cas9-  
232 mediated gene disruption purposes ranging from the creation of *in vitro* and *in vivo* models to  
233 arrayed genetic screens<sup>26</sup>. While synthetic gRNAs have previously been applied in the context  
234 of CRISPRa<sup>27</sup> thus far they have not been widely adopted possibly due to their low efficiency with  
235 sub-optimal CRISPRa systems. The production of synthetic, high-efficiency, SAM-compatible  
236 guides has presented technical challenges. Until recently, dual MS2 aptamer-containing sgRNAs,  
237 like the ~160 nucleotide GNE-3 spacer sequence and scaffold, exceeded the length of reliable  
238 direct synthesis methodology<sup>28</sup>. As an alternative approach, the use of easier-to-synthesize two-  
239 part gRNAs (crRNA + tracrRNA scaffold) is an attractive possibility. The design of these guides,  
240 however, must allow for efficient strand annealing while maintaining the structure of the MS2  
241 aptamer loops<sup>26</sup>. In addition, any synthetic guide RNA, regardless of format, needs to be stable  
242 enough throughout the delivery, dCas9 association, and target binding processes to induce  
243 measurable gene activation. Given recent advances in RNA synthesis and chemical stabilization,  
244 and to yet further expand the utility of CRISPRa, we set out to develop an optimized GNE-3-based  
245 synthetic gRNA platform.

246

247 To evaluate the impact of chemical modifications on the efficiency of CRISPRa induced  
248 by transient delivery of synthetic guides in cultured cells, we synthesized a set of sgRNAs based  
249 on the GNE-3 scaffold targeting four endogenous genes (PD-L1, CD14, CD2, CXCR4) with or  
250 without modified stabilizing nucleotides<sup>29</sup>. Individual unmodified sgRNAs were compared to  
251 identical sgRNAs containing three terminal phosphorothioated 2' O-methyl ribonucleotides at  
252 both the 5' and 3' ends (Extended Data Fig. 6a). Three days after electroporation into a CAG-  
253 CRISPRa-sel-engineered K562 population, we observed clear evidence of gene activation. We  
254 found that the modified sgRNAs demonstrated a clear advantage over the unmodified guides  
255 across all targets evaluated (Extended Data Fig. 6b-c). To our surprise, activation with the  
256 transient modified synthetic sgRNAs was qualitatively similar in some cases to stable sgRNA  
257 expression, with near-population-wide expression achieved for two of four target genes.

258

259 We next sought to determine if the GNE-3 sgRNA variant also outperformed the 2.0  
260 scaffold in a synthetic context. To this end we generated identical end-modified sgRNAs for the  
261 2.0 variant. Direct comparison in the CAG-CRISPR-sel K562 model demonstrated a general trend  
262 towards higher activation with the GNE-3 sgRNAs, although the differential was somewhat  
263 reduced compared to the stable sgRNA context (Extended Data Fig. 7).

264

265 User accessibility of synthetic guide RNA-mediated CRISPRa could be enhanced by  
266 lowering the cost and technical skill required for reagent synthesis. In principle, this could be

267 achieved by minimizing the length of the guide RNA segments with a more native, annealed two-  
268 part crRNA-tracrRNA format. In order to create synthetic material that permitted crRNA and  
269 tracrRNA hybridization while maintaining the GNE-3 scaffold loop structure, we developed two  
270 distinct concepts (Extended Data Fig. 8a). In format 1, strand 1 includes the spacer sequence  
271 and a segment of the GNE-3 MS2 containing tetraloop (Extended Data Fig. 8a-teal), which  
272 anneals to strand 2 containing the final portion of the tetraloop as well as stemloop 1, stemloop 2  
273 (with the second MS2 aptamer) and stemloop 3. Separately, in format 2, strand 1 exclusively  
274 comprises the spacer plus a short region (Extended Data Fig. 8a- orange) with complementarity  
275 to strand 2. Strand 2 of this format encodes the majority of the tetraloop and stemloops 1-3. All  
276 RNA oligonucleotides contain 5' and 3' stabilizing modifications similar to our optimized synthetic  
277 GNE-3 sgRNA. We incorporated identical spacer sequences within both formats and evaluated  
278 their relative effectiveness for activating four separate genes within CAG-CRISPRa-sel K562  
279 cells. When we analyzed target activation by flow cytometry three days post-electroporation we  
280 saw higher gene activation with format 1 across all targets (Extended Data Fig. 8b-c), and this  
281 format became a focus for follow-up studies.

282  
283 Recently, a two-part, SAM-compatible guide RNA system has been described and made  
284 commercially available<sup>27</sup>. Unlike the GNE-3 guide RNAs described herein, the commercial  
285 product contains fewer phosphorothioated 2' O-methyl ribonucleotides and has only a single MS2-  
286 modified element within stemloop 2, the MS2 sequence within the tetraloop being notably absent  
287 (Fig. 4a-top). In order to evaluate the relative functionality of these synthetic guide RNAs, we  
288 compared GNE-3 sgRNAs and format 1 two-part guide RNAs to the commercially available  
289 synthetic guide RNA format (1X MS2 two-part) in CAG-CRISPRa sel-engineered K562 and 293T  
290 populations (Fig. 4 and Extended Data Fig. 9). We found that the GNE-3 sgRNA and two-part  
291 formats generally outperformed the single MS2 containing guide (Fig. 4 and Extended Data Fig.  
292 9) with the GNE-3 sgRNA format providing the most consistent and potent activation across all  
293 tested contexts. The differential across guides was particularly pronounced in lower activity  
294 conditions (Fig 4b-c, Extended Data Fig. 9a-b gRNA-1). Only under circumstances of high  
295 CRISPRa activity, such as in 293T cells, could measurable induction be achieved with all of the  
296 evaluated 2-part and sgRNA variants (Fig 4d-e, gRNA-3/gRNA-4, Extended Fig 9).

297  
298  
299 **Discussion**

300  
301 The potential for any genome engineering technology is limited by the breadth of cell types  
302 and loci for which it can be applied. By incorporating a unique self-selecting transgenic approach  
303 with enhanced SAM-compatible guide RNA scaffolds, we have demonstrated that robust,  
304 population-wide CRISPRa is achievable across a diverse panel of target genes and cell lines, all  
305 with minimal cell manipulation steps. In addition, we show that synthetic guide RNAs can be  
306 employed for highly-efficient, short term gene activation, in some cases with population-wide  
307 efficacy. While this platform is expected to be broadly applicable, the required plasmid transfection  
308 process may limit use in cell types that are sensitive to foreign DNA or difficult to transfect with  
309 large plasmids. Adaptation of the self-selection concept with viral vector-based delivery could  
310 circumvent this bottleneck.

311  
312           Advancements in gene activator technologies are inevitable. With this in mind, we  
313 anticipate that self-selecting circuits will be compatible with future transcriptional and epigenetic  
314 modifier fusion proteins or extended Cas family member usage<sup>1</sup>. This will be critical for expanding  
315 the target space available for CRISPRa and for potentially enhancing gene expression at loci that  
316 show weak or modest induction with the SAM activator machinery.

317  
318  
319 **Methods:**

#### 320 321 **Cell culture, electroporation, transfection**

322 Cell line specific culture and manipulation protocols described in supplemental methods. All  
323 parental cell lines were sourced from the Genentech cell bank (gCell) where they were maintained  
324 under mycoplasma free conditions and authenticated by STR profiling. FACS sorting and  
325 subsequent clonal derivation/analysis presented in extended data 2 c,d was performed by WuXi  
326 AppTech.

#### 327 328 **Lentiviral production/transduction**

329 sgRNA expressing and lentiviral packaging plasmids (VSVg/Delta8.9) were transiently co-  
330 transfected into 293T cells with Lipofectamine 2000. Lentiviral supernatants were harvested at  
331 72 hours and filtered through a 0.45 µm PES syringe filter (Millipore). Transduction with lentivirally  
332 encoded guide RNAs performed as described in supplemental methods with cell line specific  
333 protocols. 3 days following lentiviral infection, cells were started on zeocin selection at cell line  
334 specific concentrations (supplemental methods) in order to select for guide RNA expressing cells.  
335 Prior to gene expression analysis, uniform selection of gRNA infected populations was confirmed  
336 by flow cytometric analysis of the co-expressed mTagBFP2 reporter.

#### 337 338 **Flow cytometry**

339 Antibody staining performed using manufacturers recommended protocols and described in  
340 supplemental methods. Data collection performed on BD FACS Celesta or BD FACS Symphony  
341 machines and analyzed by FlowJo 2 10.8.0. Gating strategy indicated in Extended Data Fig. 1b.  
342 Live cell populations were gated using FSC and SSC profiles. Where relevant, lentivirally  
343 transduced cells specifically were examined by gating on mTagBFP2 positive populations. If cell  
344 populations were selected to greater than >95% mTagBFP2 positive then this gating step was  
345 omitted for some analyses. Populations were defined by gates established as indicated with 2  
346 parameter pseudocolor plots (Extended Data Fig. 1b) with identical control cell lines expressing  
347 a non-targeting control guide RNA and stained/collected in parallel.

#### 348 349 **qRT-PCR**

350 RNA extraction performed with a Quick-RNA 96 well kit (Zymo). cDNA generation performed with  
351 a high-capacity cDNA synthesis kit using random primers and RNase inhibitor (Thermo) following  
352 recommended protocols. Quantitative RT-PCR performed with an ABI QuantStudio 7 Flex real  
353 time PCR system. Relative quantification/fold change ( $2^{-\Delta\Delta CT}$ ) analysis was performed by  
354 QuantStudio software. A GAPDH control gene used for normalization purposes.

#### 355 356 **Synthetic gRNA electroporation/transfection**

357 Direct synthesis and QC of the novel modified sgRNA and 2-part guide RNAs was performed by  
358 IDT (<https://www.idtdna.com/pages>). All synthetic gRNAs were resuspended in Nuclease-Free  
359 Duplex Buffer (30 mM HEPES, pH 7.5; 100 mM potassium acetate) (IDT). Commercially available



360 modified, synthetic 2-part guide RNAs containing a single MS2 aptamer loop purchased from  
361 Horizon inc. (<https://horizondiscovery.com/>).

362  
363 2-part crRNA and tracrRNA oligonucleotides were combined at equimolar ratios prior to a  
364 denaturation/annealing protocol (95°C 5"; cool to room temp 2°/sec). sgRNAs were also treated  
365 by heat denaturation prior to use. Cell line specific synthetic guide delivery protocols detailed in  
366 supplemental methods.

### 367 **Data/Statistical analysis**

368 Statistical tests performed as indicated in figure legends for each experiment. Error bars represent  
369 standard deviation from the mean. Data was analyzed using PRISM and/or excel software. Bar  
370 plots/scatter plots and heatmaps were generated using PRISM.

### 372 **RNA structure prediction**

373 RNA folding performed using mFold<sup>30</sup> or bifold  
374 (<https://rna.urmc.rochester.edu/RNAstructureWeb/Servers/bifold/bifold.html>) algorithms.

### 376 **Figure production**

377 Figure elements produced in Excel (Microsoft), Flowjo (Becton Dickson) and PRISM (Graphpad  
378 Software). Final figures created with BioRender.com.

### 380 **Acknowledgements**

381 We would like to acknowledge JP Fortin, Colin Watanabe, Søren Warming, Anqi Zhu, Sandra  
382 Melo, Yassan Abdolazimi, Nadia Martinez-Martin, Clark Ho, Fabiola Juárez and Letty Marroquin  
383 for thoughtful discussions and manuscript support.

### 385 **Disclaimers**

386 A.H., K.D., and B.H. are full time employees of Genentech, Inc. and shareholders of Roche.  
387 Products and tools supplied by IDT are for research use only and not intended for diagnostic or  
388 therapeutic purposes. Purchaser and/or user is solely responsible for all decisions regarding the  
389 use of these products and any associated regulatory or legal obligations. J.A.G and A.M.J are  
390 employees of Integrated DNA Technologies, which offers reagents for sale similar to some of the  
391 compounds described in the manuscript.

### 393 **Data and Materials Availability Statement**

394 The datasets generated during and/or analyzed during the current study are available from the  
395 corresponding author on reasonable request. Biological materials will be provided to requesters  
396 through a material transfer agreement. Vector and guide RNA sequences are provided in  
397 supplemental methods. Synthetic guide RNAs can be purchased through IDT.

398  
399  
400  
401

402 **Figures and Figure Legends:**  
403

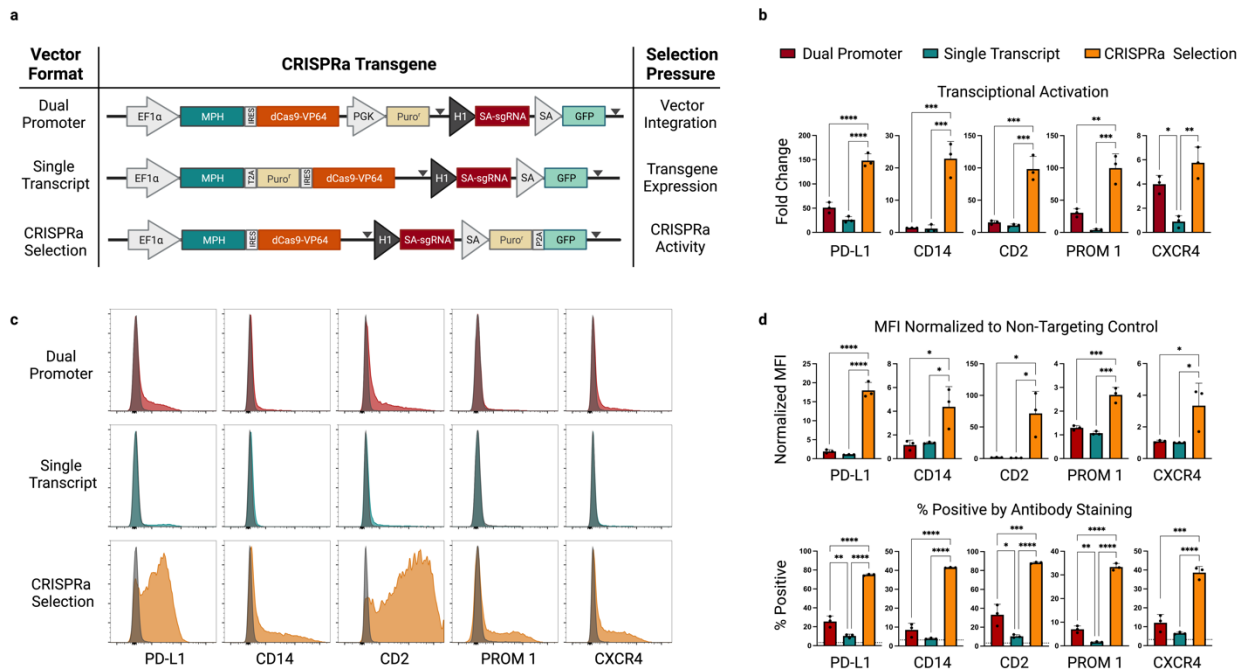

404  
405  
406  
407  
408

**Fig. 1: A self-selecting CRISPRa piggyBac vector for the rapid generation of stable, high-efficiency CRISPRa cell populations.**

409 **a**, Vector format and selective strategy for the evaluated piggyBac CRISPRa expression-reporter vectors.  
410 Expression of the MCP-P65-HSF1 (MPH) activator and dCas9-VP64 is driven by a constitutive, human  
411 EF1α promoter. A human H1 promoter drives constitutive expression of a sgRNA complementary to the  
412 self-activating (SA) promoter upstream of a GFP reporter. Expression of a puro<sup>r</sup> gene is driven either by its  
413 own constitutive promoter (dual promoter), transcriptionally linked to the MPH/ dCas9-VP64 (single  
414 transcript) or under control of the CRISPRa dependent SA promoter (CRISPRa selection). Grey triangles  
415 indicate the location of LoxP sites. PiggyBac engineered K562 populations were generated in triplicate for  
416 each vector format and enriched with puro selection. sgRNAs complementary to the promoter proximal  
417 region of the indicated genes were cloned into a lentiviral vector context containing a mTagBFP2/zeocin  
418 selection cassette (Extended data 1a). Following transduction and zeocin selection target gene expression  
419 was evaluated by quantitative RT-PCR (qRT-PCR) **b**, and flow cytometry at day 14 post-infection (**c-d**).  
420 Representative histograms for each condition are overlaid with histograms from stained cell populations  
421 expressing a non-targeting control gRNA (**c**) (gray). Infections were performed in duplicate and averaged.  
422 (Median fluorescence intensity (MFI) was normalized to MFI of an antibody-stained sample expressing a  
423 non-targeting gRNA (**d, top**). Percentage of cells positive by antibody staining is presented (**d, bottom**)  
424 and background staining from a control sample expressing a non-targeting gRNA is indicated with a dashed  
425 horizontal line for each gene. Statistical comparison was performed by an unpaired 1-way ANOVA. \* p<0.5,  
426 \*\* p<0.01, \*\*\* p<0.001. EF1α-Elongation factor alpha, GFP-green fluorescent protein, dCas9-vp64-  
427 nuclease dead spCas9+vp64 activator fusion, P2A-porcine teschovirus-1 2A self-cleaving peptide, HSF-  
428 heat shock factor, PD-L1-Programmed death-ligand1 (CD274), CD14-cluster of differentiation 14, CD2-  
429 Cluster of differentiation 2, Prom1-prominin-1 (CD133), CXCR4-C-X-C chemokine receptor type 4  
430 (CD184).  
431

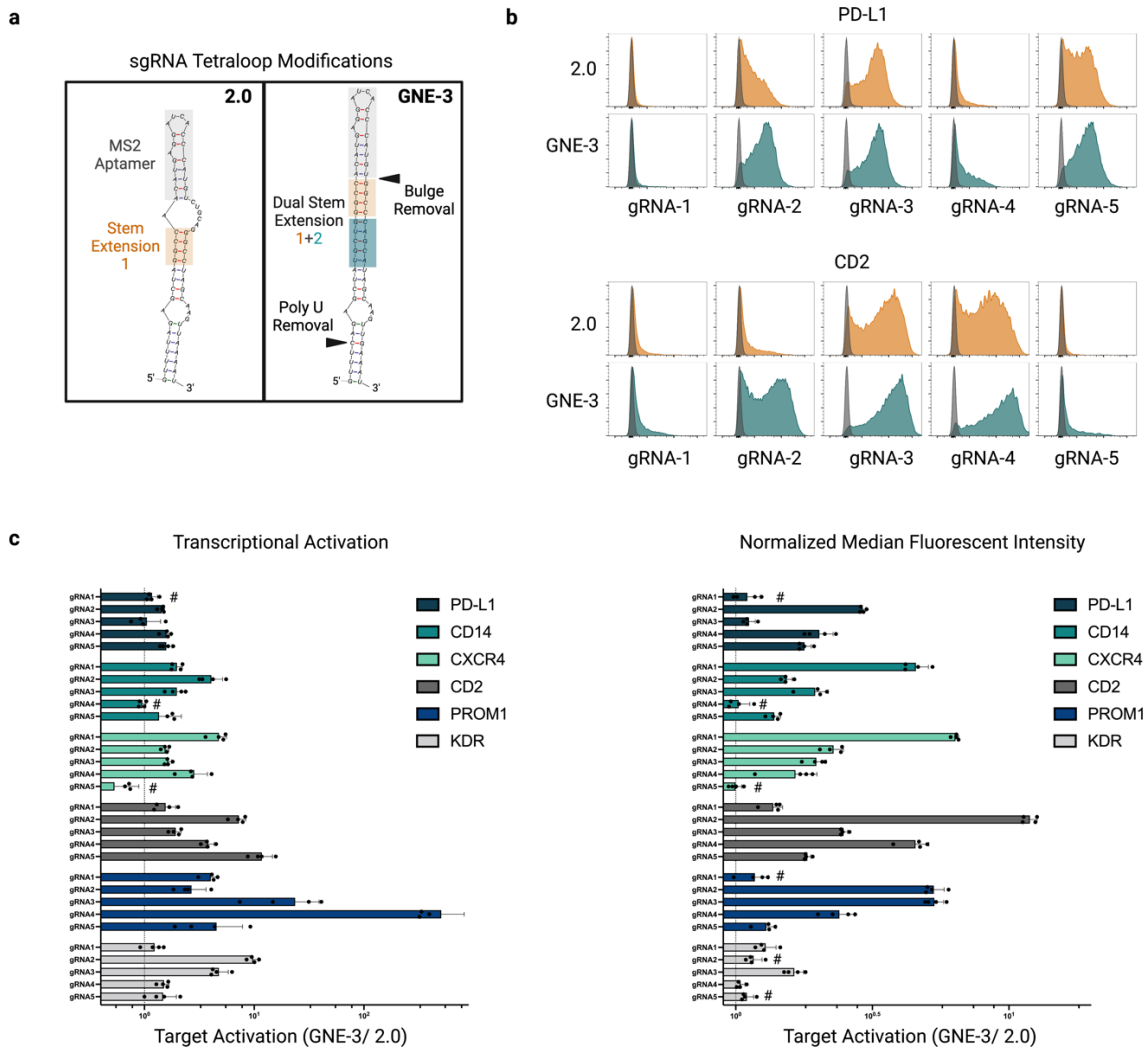

432  
433

434 **Fig. 2: Relative CRISPR activation efficiency of sgRNAs containing an optimized MS2 aptamer**  
435 **containing scaffold.**

436

437 **a**, Structure diagram of the MS2-aptamer containing tetraloop in the 2.0 sgRNA format<sup>13</sup> (left) or an  
438 optimized tetraloop structure (right and Extended Data Fig. 3). The optimized GNE-3 tetraloop contains an  
439 additional stem extension and removal of a polyU tract<sup>21</sup>. Additionally, the bulge region connecting the MS2  
440 aptamer and stem extension region 1 in the 2.0 format has been removed. **b**, Flow cytometric analysis of  
441 target gene activation by sgRNAs with either a 2.0 (orange) or GNE-3 (teal) scaffold context. Representative  
442 histograms of analyzed K562 CRISPRa-sel populations infected with 5 distinct spacer sequences targeting  
443 the promoter proximal region of PD-L1 (top) or CD2 (bottom). Populations infected with a non-targeting  
444 sgRNA sequence overlaid (gray). **c**, Activation of 6 target genes by GNE-3 sgRNAs normalized to the  
445 activation efficiency of the same spacer sequence in a 2.0 format (dashed line). Normalized gene activation  
446 was evaluated in zeocin selected populations by qRT-PCR (left) at day 14 post-sgRNA infection or by flow  
447 cytometry (right) at day 10 post-sgRNA infection. n=4 replicates per sgRNA.

448

449

450

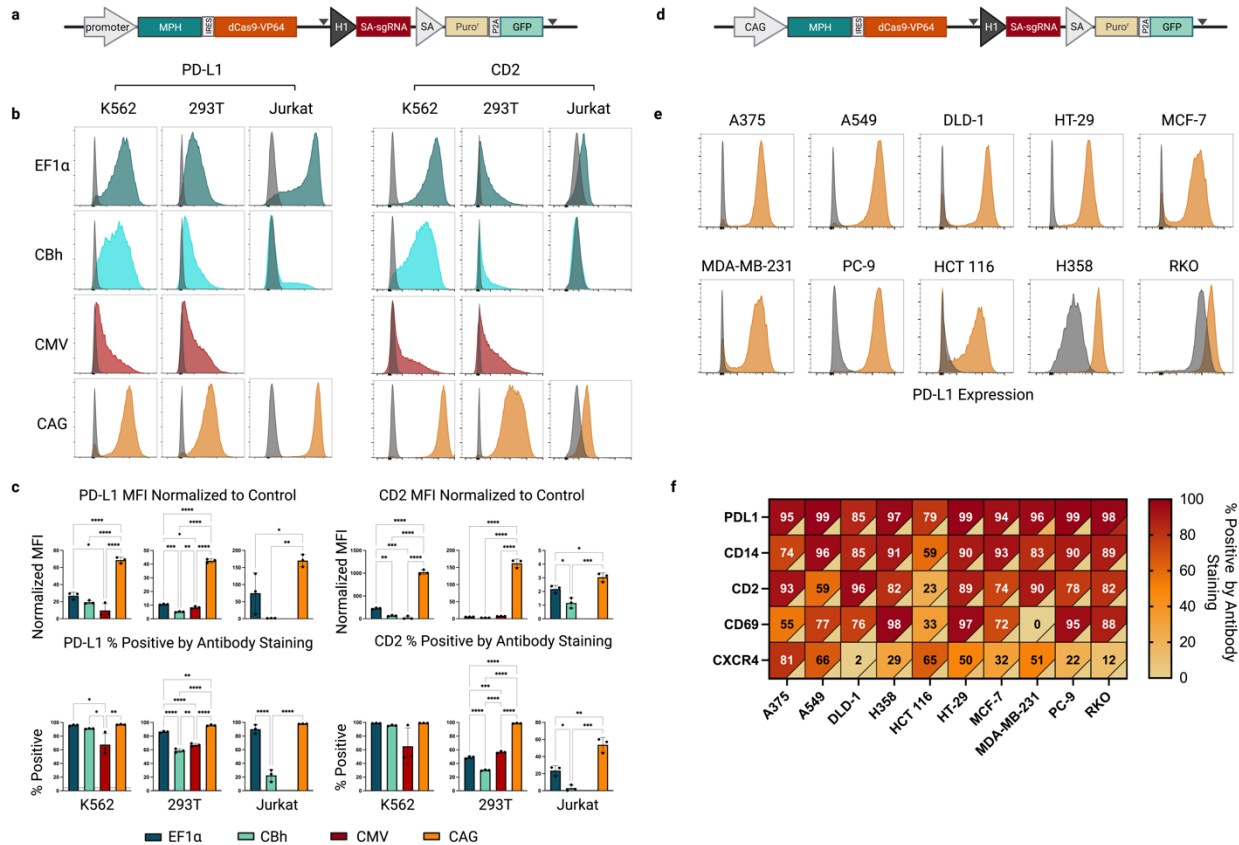

451  
452

453 **Fig. 3: Promoter optimization and application of the CRISPRa-sel strategy across a panel of commonly**  
454 **used cell lines.**

455  
456 **a**, Schematic representation of the CRISPRa-sel vector indicating the location of the promoter driving  
457 expression of the MPH/dCas9-VP64 transcript. **b-c**, Activation of PD-L1 (left) or CD2 (right) target genes  
458 evaluated by flow cytometry in K562, 293T and Jurkat cell lines engineered with CRISPRa-sel piggyBac  
459 vectors utilizing an EF1 $\alpha$  (teal), CBh (aqua), CMV (maroon) or CAG (orange) promoter 14 days post-infection  
460 with a GNE-3 sgRNA. **(b)** Activation displayed by representative histograms overlaid with expression profiles  
461 from cells infected with a non-targeting sgRNA (gray). **(c)** Normalized median fluorescence intensity (MFI) (top)  
462 or percentage positive (bottom) of indicated genes/cell populations by antibody staining. The percent positive of  
463 stained control populations infected with a non-targeting sgRNA are indicated by a dashed horizontal line.  
464 (Note: *CMV CRISPRa-sel Jurkat populations did not grow out efficiently and were not included in the*  
465 *analysis.*) **(d)** Schematic representation of the CAG CRISPRa-sel piggyBac vector. **(e)** Representative flow  
466 cytometric histograms of PD-L1 activation across 10 commonly used cell lines engineered with a CAG-driven  
467 CRISPRa-sel piggyBac vector and PD-L1 targeting GNE-3 sgRNA. **(f)** Heatmap representing the percent  
468 positive of 5 target genes (PD-L1, CD14, CD2, CD69 and CXCR4) across 10 CAG CRISPRa-sel engineered  
469 cell lines (A375, A549, DLD-1, H358, HCT 116, HT-29, MCF-7, MDA-MB-231, PC-9 or RKO). Percent positive  
470 of stained cell populations expressing a non-targeting sgRNA represented colorimetrically in the lower right  
471 corner of each cell. Gene-activating or control guides were expressed using dual sgRNA lentivectors  
472 (supplemental methods). CRISPRa cell populations generated in triplicate and infected with indicated sgRNAs  
473 in technical duplicates which were averaged before statistical comparison was performed by an unpaired 1-way  
474 ANOVA. \*  $p < 0.5$ , \*\*  $p < 0.01$ , \*\*\*  $p < 0.001$ . Grey triangles indicate the location of LoxP sites. CBh -Chicken  $\beta$ -  
475 actin hybrid promoter, CMV- human cytomegalovirus immediate-early gene enhancer/promoter or CAG- CMV  
476 enhancer-chicken  $\beta$ -actin-rabbit  $\beta$ -globin synthetic hybrid promoter.

477

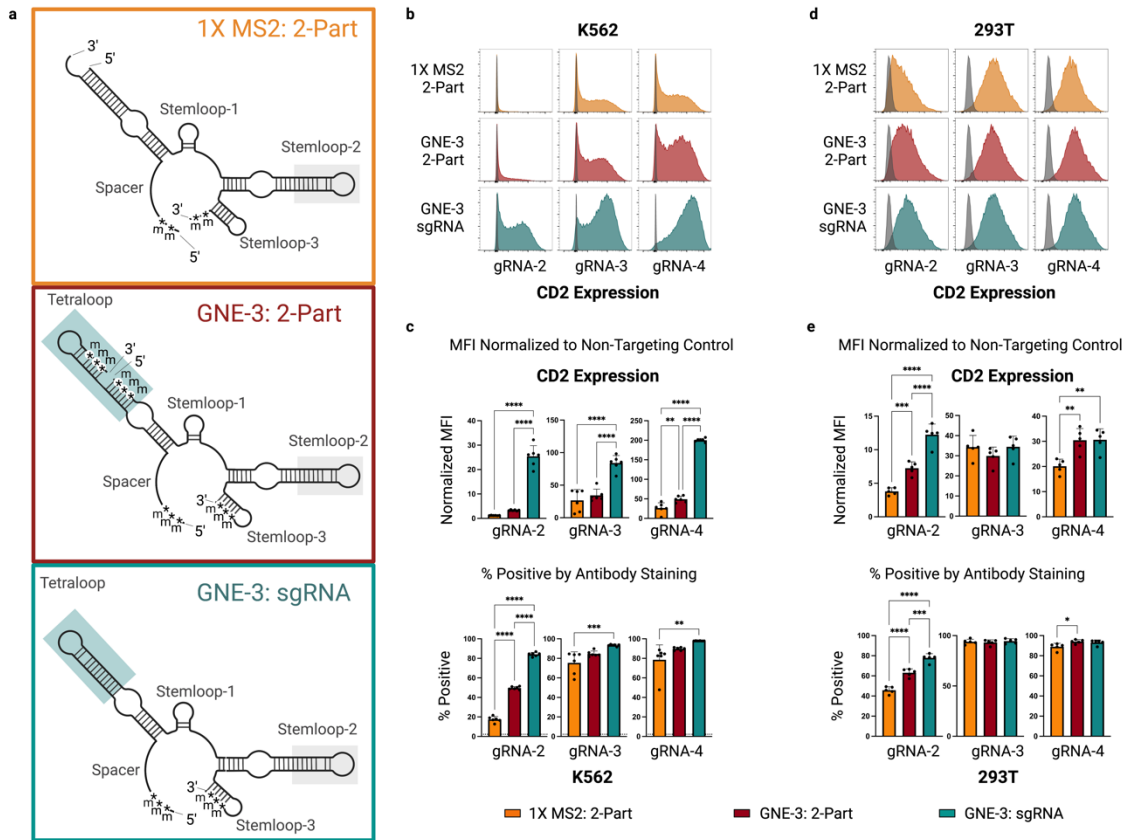

478

479

480 **Fig. 4: Evaluation of CRISPRa synthetic guide formats across 2 cell lines.**

481

482 **a**, Structure diagrams of a commercially available, chemically modified, 2-part synthetic gRNA containing  
 483 a single MS2 aptamer loop (top-orange); a modified, 2-part format 1 synthetic gRNA containing a GNE-3  
 484 scaffold (center-maroon); or a modified sgRNA with a GNE-3 scaffold (bottom-teal). Blue boxes highlight  
 485 the MS2 aptamer-containing GNE-3 tetraloop and grey boxes indicate the MS2-aptamer on stemloop 2. **b-  
 486 e** CRISPR-mediated transcriptional activation of a CD2 target gene in two CAG-CRISPRa-sel engineered  
 487 cell lines (K562 or 293T) by electroporated modified, synthetic gRNAs in the formats depicted in **(a)**. CD2  
 488 target expression by 3 spacer sequences in an engineered K562 cell line assessed by flow cytometry. CD2  
 489 expression displayed by representative histograms overlaid with a control population **(b)** or summarized by  
 490 median fluorescent intensity normalized to a non-targeting control **(c-upper)** or percent positive **(c-  
 491 lower)**. Percent positive of a stained control population infected with a non-targeting sgRNA are indicated  
 492 by a dashed horizontal line. **d-e**, CD2 target activation by synthetic gRNA formats as in b-c but in a 293T  
 493 cell line. Flow cytometry performed 3 days after synthetic guide delivery. Statistical comparison between  
 494 guide formats was performed by an unpaired 1-way ANOVA. \* p<0.5, \*\* p<0.01, \*\*\* p<0.001. n=6 for K562,  
 495 n=5 for 293T. m=2'-O methyl. \*= phosphorothioate linker.

496

497



498

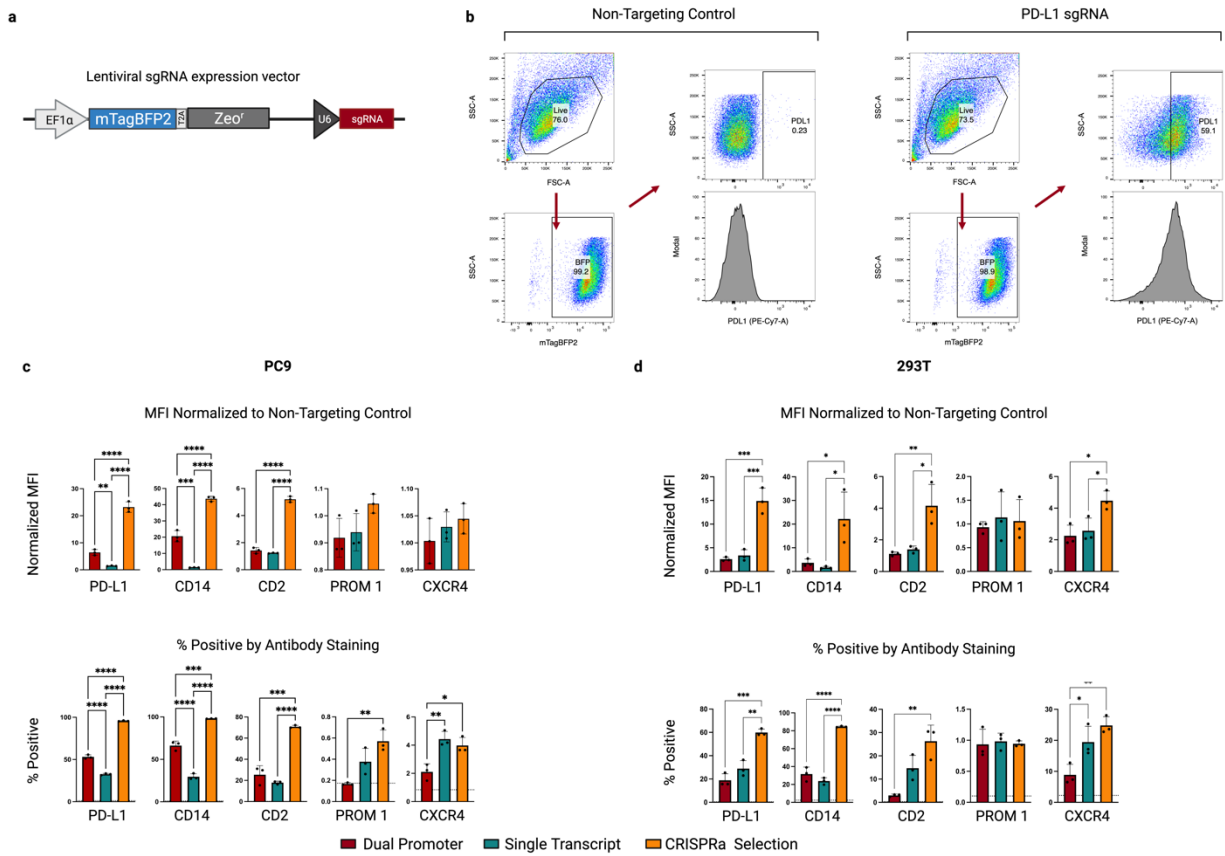

499

500

501

502

503

504

505

506

507

508

509

510

511

512

513

514

515

516

517

518

519

**Extended Data Fig. 1: Comparison of CRISPRa piggyBac vector systems in additional cell lines.**

**a**, Schematic representation of the lentiviral sgRNA expression vector containing a mTagBFP2 marker and zeocin resistance (Zeo<sup>r</sup>) selection cassette. **b**, Representative gating strategy for flow cytometric analysis shown in CRISPRa-sel populations expressing either a non-targeting control (left) or PD-L1 targeting sgRNA (right). Live populations were identified as indicated based on SSC-A (side scatter) and FSC-A (forward scatter) profiles and sgRNA expressing cells were identified by expression of the mTagBFP2 fluorescent protein. Positive population gates were defined in a control sample stained in parallel. **c**, Flow cytometric analysis of CRISPRa mediated gene expression in cell populations generated with three CRISPRa piggyBac systems utilizing distinct selection strategies (Fig.1). Analysis performed 14-25 days post lentiviral transduction of sgRNAs complementary to the promoter proximal regions of the indicated genes (PD-L1, CD14, CD2, PROM1 or CXCR4) for PC-9, or **d**, 293T cells. (Median fluorescence intensity (MFI) was normalized to MFI of an antibody-stained sample expressing a non-targeting gRNA (top). Percent antibody positive is presented (bottom) and background staining from a control sample expressing a non-targeting gRNA is indicated with a dashed horizontal line for each gene. Cell populations generated in triplicate. sgRNAs infected in duplicate and averaged prior to statistical comparison with an unpaired 1-way ANOVA. \* p<0.5, \*\* p<0.01, \*\*\* p<0.001.

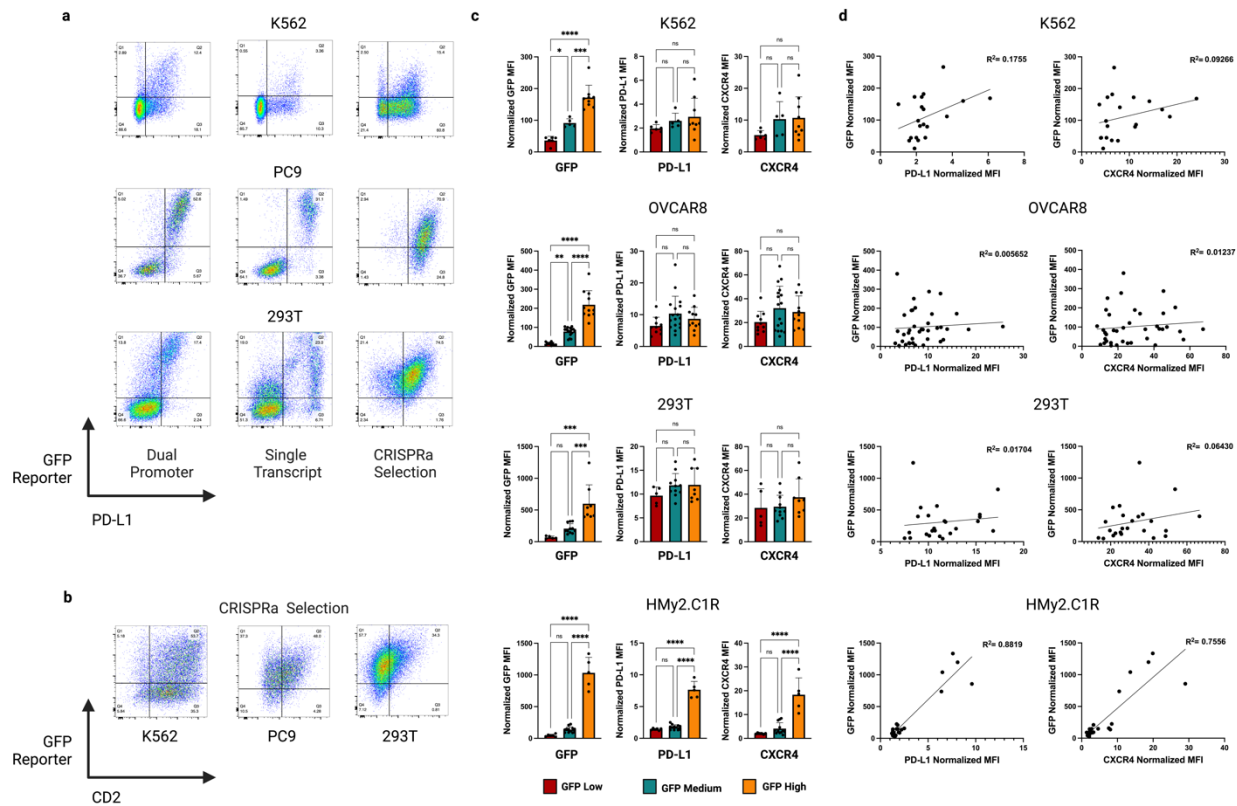

520  
521  
522  
523  
524  
525  
526  
527  
528  
529  
530  
531  
532  
533  
534  
535  
536  
537  
538  
539

### **Extended Data Fig. 2: An integrated CRISPRa dependent GFP reporter is an inconsistent marker of CRISPRa efficiency across multiple cell lines.**

**a**, Flow cytometric analysis of GFP CRISPRa reporter vs endogenous PD-L1 target gene activation across three CRISPRa piggyBac formats in three cell lines (Fig. 1). **b**, GFP CRISPRa reporter vs endogenous CD2 activation in three cell lines engineered with a CRISPRa-sel piggyBac. **c**, Flow cytometric analysis of GFP CRISPRa reporter vs two endogenous CRISPRa target genes (PD-L1, CXCR4) in clones derived from CRISPRa-sel populations pre-sorted on GFP expression using flow assisted cell sorting (FACS) in four cell lines. Bar graphs of GFP median fluorescence intensity (MFI) in clones normalized to parental cell line (left). Target gene expression in engineered clones infected with an endogenous gene targeting sgRNAs (PD-L1 or CXCR4) and normalized to non-targeting control gRNA (middle/right). **d**, Scatter plots showing correlation of normalized MFI for CRISPRa dependent GFP reporter vs endogenous target gene activation. R squared for simple linear regression analysis indicated.

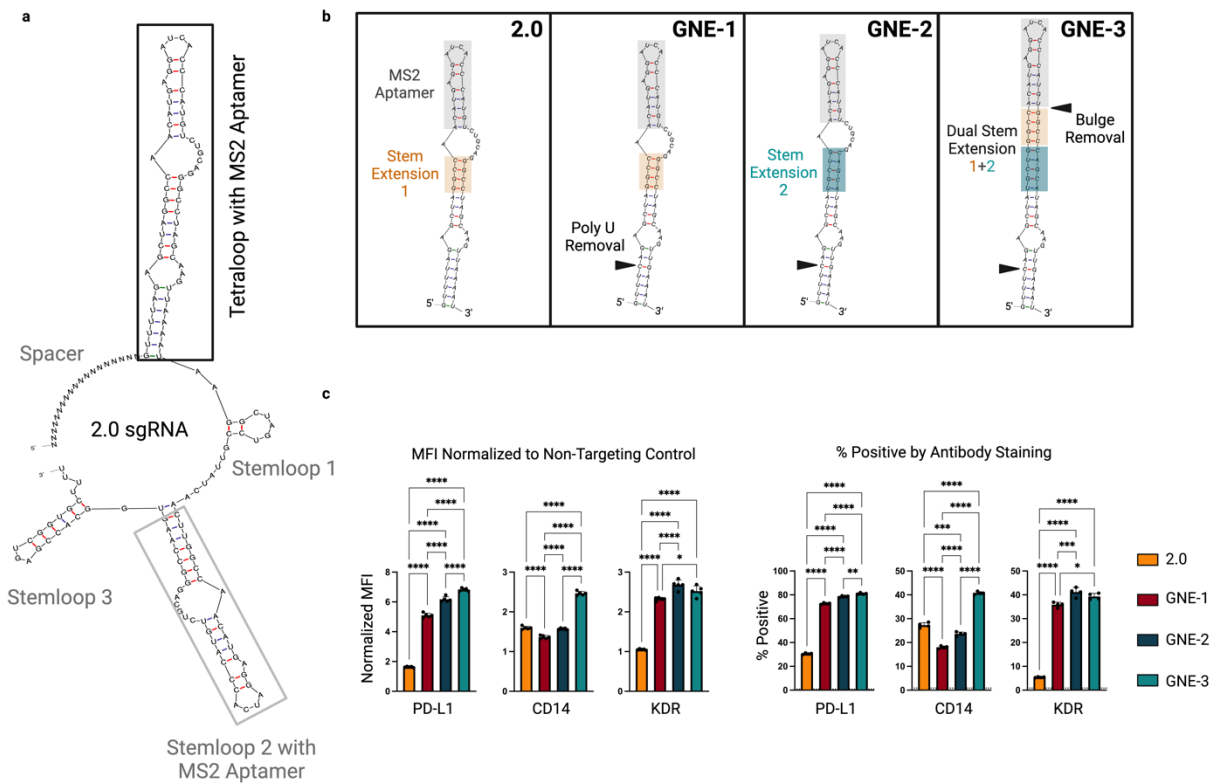

540  
541

542 **Extended Data Fig. 3: CRISPR activation efficiency of sgRNAs containing scaffold structural**  
543 **modifications.**

544  
545 **a**, Structure of the 2.0 sgRNA<sup>13</sup> with a modified MS2 aptamer containing tetraloop (black box) and stemloop  
546 2 (gray box). **b**, Enlargement of tetraloop structure with highlighted sequence modifications in the alternate  
547 scaffolds evaluated. **c**, Flow cytometry data comparing activation efficiency of the four scaffold formats in  
548 a K562 CRISPRa-sel population. Cell populations were lentivirally transduced with the sgRNAs targeting 3  
549 endogenous gene targets (PD-L1, CD14 or KDR) and analyzed 7 days post infection. Data represented as  
550 median fluorescence intensity (MFI) normalized to a cell population infected with a non-targeting sgRNA  
551 (left) or percentage positive (right) with non-targeting gRNA represented by dashed horizontal line. n=4  
552 technical replicates per condition. Statistical comparison was performed by an unpaired 1-way ANOVA. \*  
553 p<0.5, \*\* p<0.01, \*\*\* p<0.001. KDR-Kinase Insert Domain Receptor (VEGF2R/FLK1).  
554  
555  
556  
557  
558  
559

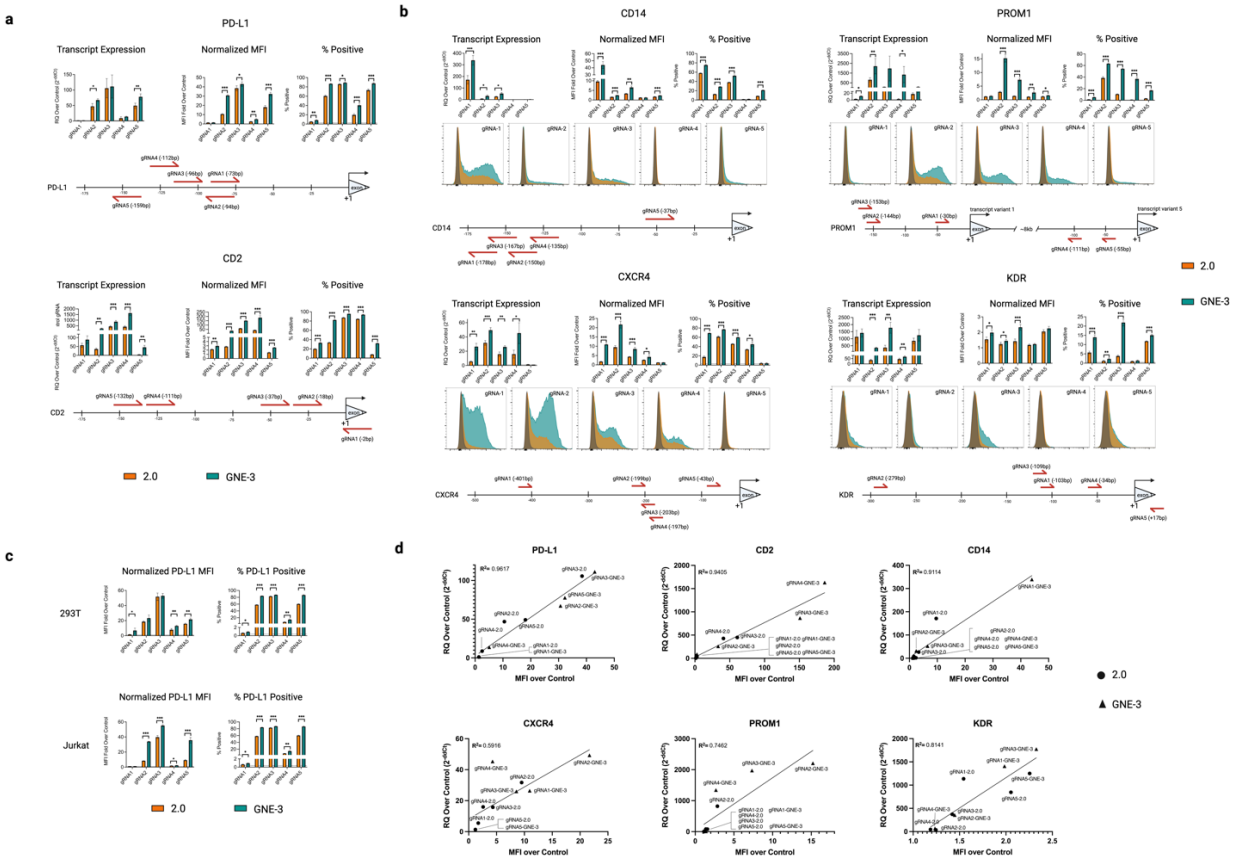

560  
561  
562  
563  
564  
565  
566  
567  
568  
569  
570  
571  
572  
573  
574  
575  
576  
577  
578  
579  
580  
581

**Extended Data Fig. 4: sgRNA activation efficiency of guides in the 2.0 or GNE-3 scaffold context.**

**a,b**, CRISPRa target gene activation by sgRNAs in a 2.0 (orange) or GNE-3 (teal) sequence context in a K562 CRISPRa-sel population. **(a)** Expression of PD-L1 (upper) or CD2 (lower) target genes assessed by qRT-PCR (left bar plots) and relative to a non-targeting control. Target gene expression assessed by flow cytometry and displayed by median fluorescence intensity (MFI) normalized to a non-targeting control (middle bar plot) or percent target positive (right bar plot). Background percent positive using a non-targeting control sgRNA indicated by horizontal dashed line. The position of guide RNA binding relative to the transcription start site (TSS) for each gene is indicated below. **(b)** Activation of 4 additional target genes with 2.0 or GNE-3 sgRNAs as assessed by transcript expression (top left), or flow cytometry (Normalized MFI- center; percent positive right or representative histograms, bottom panels). Guide position for each gene relative to the TSS indicated below. **c**, CRISPR mediated activation of PD-L1 in two additional cell lines (293T-top and Jurkat-bottom) by sgRNAs in a 2.0 or GNE-3 sequence context. PD-L1 expression assessed by flow cytometry and represented as MFI normalized to a non-targeting control (left) or percentage PD-L1 positive (right). Percent PD-L1 positive of cells infected with a non-targeting sgRNA represented by a horizontal dashed line. **d**, Scatter plots showing correlation of protein expression (normalized MFI) and transcript expression (qRT-PCR) for each sgRNA evaluated. R squared for simple linear regression analysis indicated. Statistical significance determined by a 2-tailed Student's t-test assuming unequal variance. \* p<0.5, \*\* p<0.01, \*\*\* p<0.001. RQ-Relative Quantity

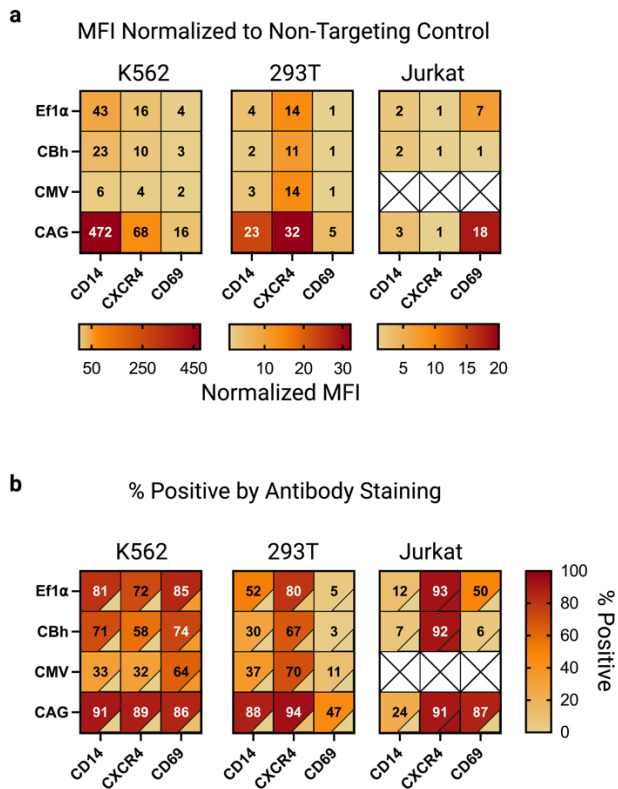

582  
583  
584  
585  
586

**Extended Data Fig. 5: Extended CRISPRa-sel promoter optimization and application in K562, 293T and Jurkat cell lines.**

587 **a,b** Heatmap representing endogenous gene activation of 3 target genes in K562, 293T or Jurkat  
588 populations engineered with CRISPRa-sel piggyBac vectors driven by the indicated promoters (Ef1 $\alpha$ , CBh,  
589 CMV or CAG). Cells were infected with lentivirus encoding dual GNE-3 sgRNAs targeting the indicated  
590 genes (CD14, CXCR4 or CD69) and assayed by flow cytometry 14 days post-infection/zeo selection. **(a)**  
591 Median fluorescence intensity (MFI) normalized to a stained cell population infected with a non-targeting  
592 control sgRNA in K562 (left), 293T (center) or Jurkat (right). Colorimetric scale for each cell line indicated.  
593 **(b)** Percentage of the indicated cell populations positive by antibody staining. Percent positive of stained  
594 cell populations expressing a non-targeting sgRNA represented colorimetrically in the lower right corner of  
595 each cell. CRISPRa cell populations generated in triplicate and infected with indicated sgRNAs in technical  
596 duplicates.

597  
598  
599  
600



601  
602

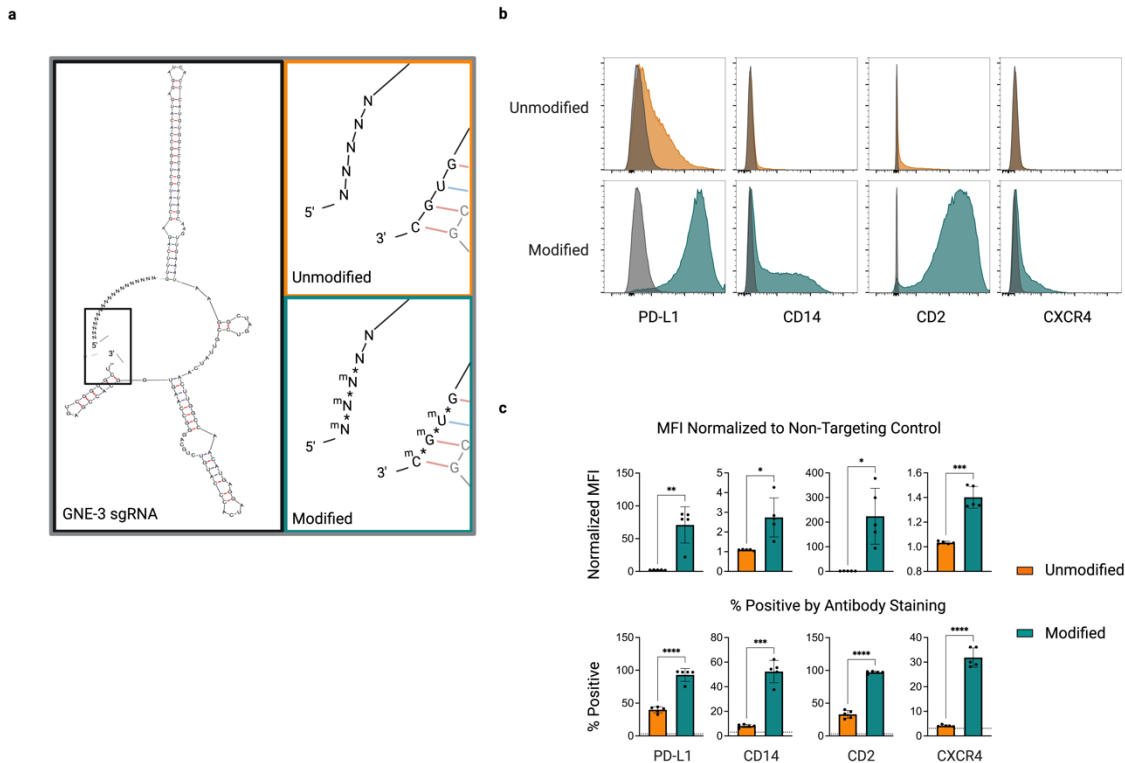

603  
604  
605  
606  
607  
608  
609  
610  
611  
612  
613  
614  
615  
616  
617  
618  
619  
620

**Extended Data Fig. 6: Chemical modification of synthetic GNE-3 sgRNAs enhances target gene activation.**

**a**, Structural diagram of a full sgRNA with GNE-3 scaffold highlighting 5'/3' ends (black box). Magnified view of sgRNA 5'/3' end regions highlighting unmodified (orange) or modified (teal) nucleotides. Modified sgRNAs contain 2'-O-methyl (m)/ phosphorothioate (\*) linker modifications. **b,c** Assessment of CRISPR mediated gene activation by unmodified or modified sgRNAs in a CAG-CRISPRa-sel engineered K562 population and assessed 3 days post-sgRNA delivery. **(b)** Gene expression displayed by representative flow cytometry histograms in populations electroporated with unmodified (top row, orange) or modified (bottom row, teal) GNE-3 sgRNAs. Stained cells electroporated with a non-targeting synthetic sgRNA overlaid in gray. **(c)** Median fluorescence intensity (MFI) of K562 populations stained with antibodies for the indicated genes (PD-L1, CD14, CD2, CXCR4) and normalized to a population of stained cells electroporated with a non-targeting sgRNA (top). Percentage of cells positive by antibody staining (bottom). Background staining of a cell population electroporated with a non-targeting control sgRNA indicated with a dashed horizontal line. n=5 technical replicates per condition. Statistical significance determined by an unpaired 2-tailed t-test with a Welch's correction. \* p<0.5, \*\* p<0.01, \*\*\* p<0.001.

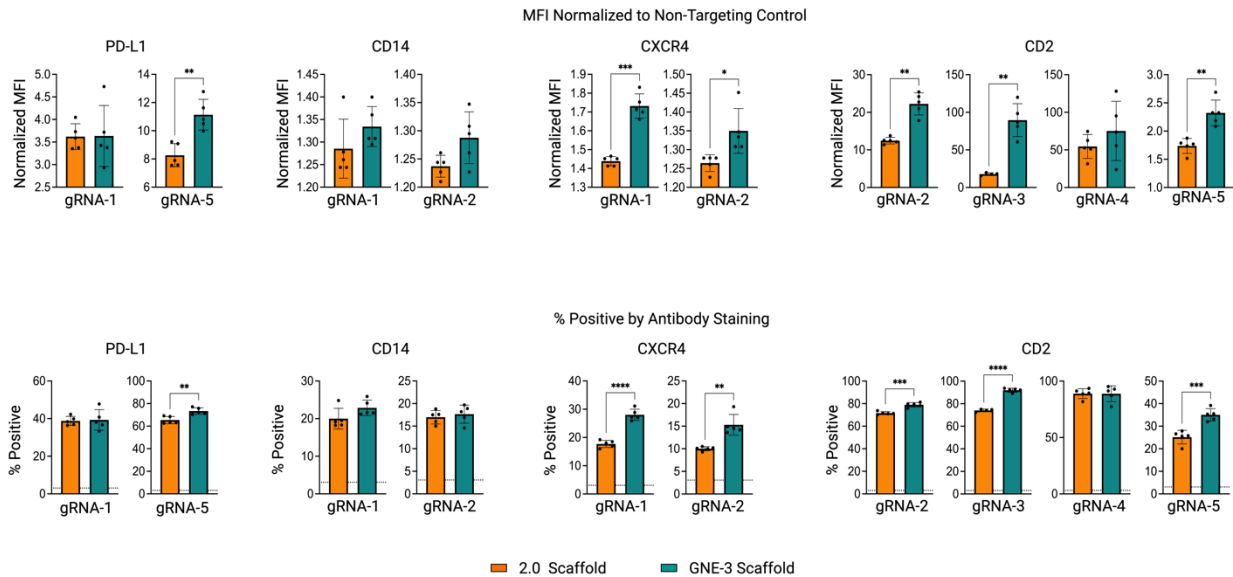

621  
622  
623  
624  
625  
626  
627  
628  
629  
630  
631  
632  
633

**Extended Data Fig. 7: Activation efficiency of synthetic, modified, sgRNAs with a 2.0 or GNE-3 scaffold.**

Evaluation of CRISPR mediated gene activation in a CAG-CRISPRa sel engineered K562 population electroporated with modified synthetic sgRNAs in a 2.0 (orange) or GNE-3 (teal) scaffold context. Activation of 4 target genes (PD-L1, CD14, CXCR4 or CD2) by flow cytometry 3 days post sgRNA electroporation. Data represented as normalized median fluorescent intensity (top) or percent positive observed by antibody staining (bottom). Background antibody staining indicated by horizontal dashed line. n=5 technical replicates per condition. Statistical significance determined by an unpaired 2-tailed, t-test with a Welch's correction. \* p<0.5, \*\* p<0.01, \*\*\* p<0.001.

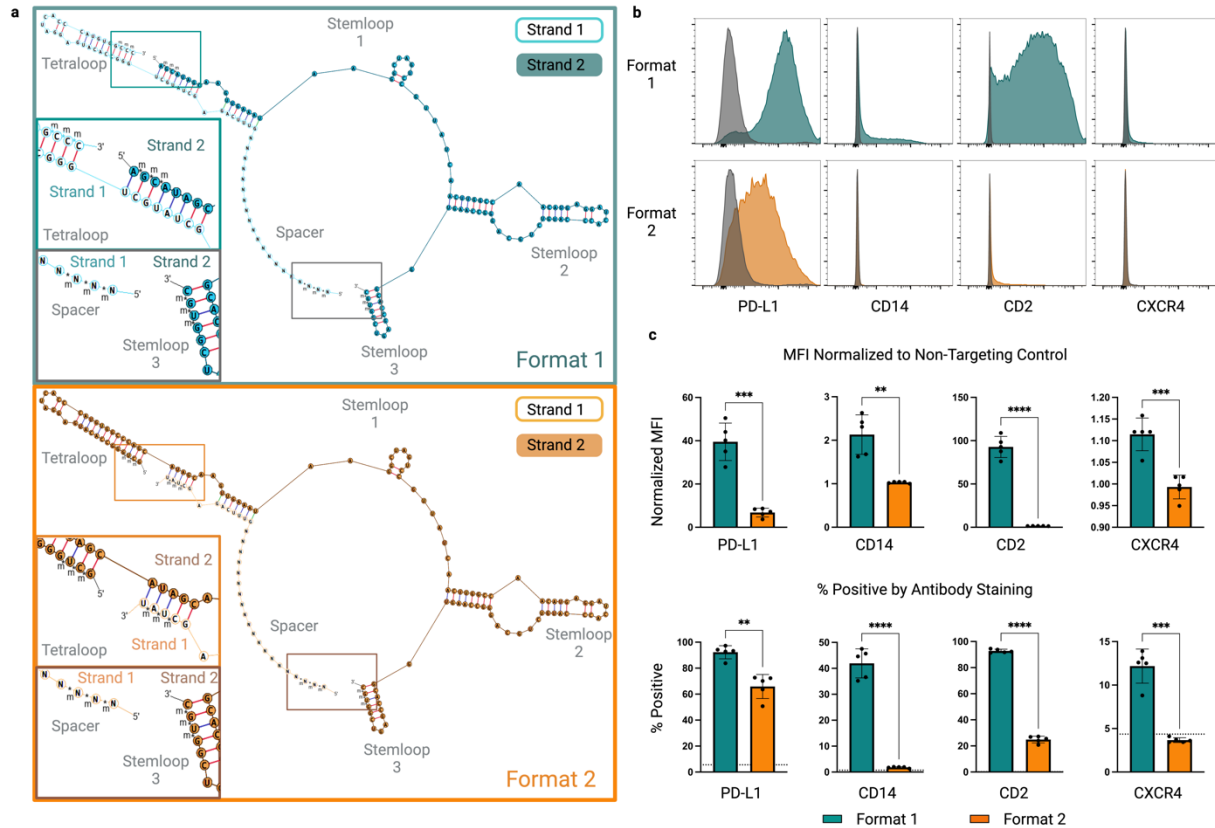

634  
635  
636  
637  
638  
639  
640  
641  
642  
643  
644  
645  
646  
647  
648  
649  
650  
651  
652  
653

**Extended Data Fig. 8: Comparison of alternate synthetic, 2-part GNE-3 guide RNA formats.**

**a**, Diagrams of alternate 2-part, modified, GNE-3 scaffold containing guide RNA structures. **Format 1** (teal) encodes a spacer and the majority of the MS2 containing tetraloop on strand 1. Strand 2 of this format encodes the remainder of the tetraloop as well as stemloop 1, stemloop 2 with a second MS2 aptamer and stemloop 3. Strand 1 of the alternate format 2 structure (orange) encodes a spacer sequence and a short 3' sequence predicted to anneal to the strand 2 scaffold containing the GNE-3 tetraloop and stemloops 1-3. Inset panels indicate the 2'-O-methyl and phosphorothioate linkers on the distal ends of each strand. **b-c**, Evaluation of alternate formats in CAG CRISPRa-sel engineered K562 populations and 3 days post gRNA electroporation. Expression of indicated endogenous target genes (PD-L1, CD14, CD2 or CXCR4) were evaluated by flow cytometry and presented as **b**, representative histograms overlaid with non-targeting control electroporated populations (gray) or **c**, summarized as normalized median fluorescence intensity (top) or percentage target gene positive (bottom). Background staining indicated by horizontal dashed line. n=5 technical replicates per condition. Statistical significance determined by an unpaired 2-tailed t-test with a Welch's correction. \* p<0.5, \*\* p<0.01, \*\*\* p<0.001. m=2'-O methyl. \*= phosphorothioate linker.

654  
655

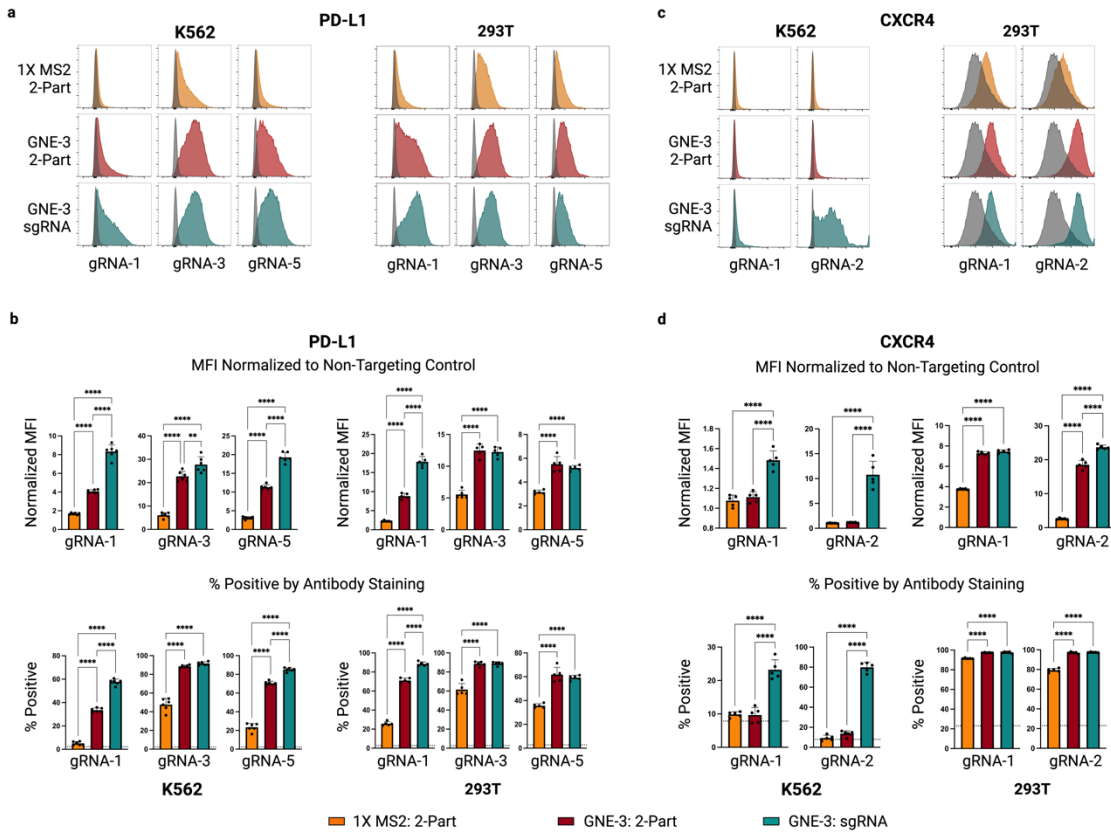

656  
657

**658 Extended Data Fig. 9: Evaluation of CRISPRa synthetic guide formats in an expanded cell panel.**

659

660 **a-d**, Target gene activation comparing three different synthetic guide RNA formats, 1X MS2 2-Part (orange),  
 661 GNE-3 2-Part (maroon) and GNE-3 sgRNA (teal) as illustrated in Fig. 4a, across CRISPRa-sel K562 and  
 662 293T cell populations. **(a)** PD-L1 and **(c)** CXCR4 activation assessed by flow cytometry of antibody-stained  
 663 cell populations 3 days post gRNA electroporation (K562) or transfection (293T). Representative  
 664 histograms for each gene targeting gRNA are shown, overlaid with histograms for the non-targeting gRNA  
 665 control (grey). Median fluorescence intensity for each gene targeting gRNA normalized to the non-targeting  
 666 gRNA control for **(b, top)** PDL1 and **(d, top)** CXCR4. Percentage of cells positive by antibody staining for  
 667 PD-L1 **(b, bottom)** or CXCR4 **(d, bottom)**, with background staining indicated by the horizontal dashed  
 668 line. n=5 technical replicates per condition. Statistical comparison was performed by an unpaired 1-way  
 669 ANOVA. \*\* p<0.01, \*\*\*\* p<0.0001.

670

671

672  
673  
674

## References:

- 675 1. Pickar-Oliver, A. & Gersbach, C. A. The next generation of CRISPR–Cas technologies and  
676 applications. *Nat Rev Mol Cell Bio* **20**, 490–507 (2019).
- 677 2. Adli, M. The CRISPR tool kit for genome editing and beyond. *Nat Commun* **9**, 1911 (2018).
- 678 3. Wang, H., Russa, M. L. & Qi, L. S. CRISPR/Cas9 in Genome Editing and Beyond. *Annu Rev*  
679 *Biochem* **85**, 1–38 (2015).
- 680 4. Doench, J. G. Am I ready for CRISPR? A user’s guide to genetic screens. *Nat Rev Genet* **19**,  
681 67–80 (2018).
- 682 5. Meyers, R. M. *et al.* Computational correction of copy-number effect improves specificity of  
683 CRISPR-Cas9 essentiality screens in cancer cells. *Nat Genet* **49**, 1779–1784 (2017).
- 684 6. Behan, F. M. *et al.* Prioritization of cancer therapeutic targets using CRISPR–Cas9 screens.  
685 *Nature* **568**, 511–516 (2019).
- 686 7. Haley, B. & Roudnicky, F. Functional Genomics for Cancer Drug Target Discovery. *Cancer*  
687 *Cell* **38**, 31–43 (2020).
- 688 8. Gilbert, L. A. *et al.* CRISPR-mediated modular RNA-guided regulation of transcription in  
689 eukaryotes. *Cell* **154**, 442–451 (2013).
- 690 9. Kanafi, M. M. & Tavallaei, M. Overview of advances in CRISPR/deadCas9 technology and its  
691 applications in human diseases. *Gene* **830**, 146518 (2022).
- 692 10. Dominguez, A. A., Lim, W. A. & Qi, L. S. Beyond editing: repurposing CRISPR-Cas9 for  
693 precision genome regulation and interrogation. *Nature reviews. Molecular cell biology* **17**, 5–15  
694 (2016).
- 695 11. Gilbert, L. A. *et al.* Genome-Scale CRISPR-Mediated Control of Gene Repression and  
696 Activation. *Cell* **159**, 647–661 (2014).
- 697 12. Kampmann, M. CRISPRi and CRISPRa Screens in Mammalian Cells for Precision Biology  
698 and Medicine. *ACS chemical biology* **13**, 406–416 (2018).
- 699 13. Konermann, S. *et al.* Genome-scale transcriptional activation by an engineered CRISPR-  
700 Cas9 complex. *Nature* **517**, 583–588 (2015).
- 701 14. Shakirova, K. M., Ovchinnikova, V. Y. & Dashinimaev, E. B. Cell Reprogramming With  
702 CRISPR/Cas9 Based Transcriptional Regulation Systems. *Frontiers Bioeng Biotechnology* **8**,  
703 882 (2020).
- 704 15. Kumar, M., Keller, B., Makalou, N. & Sutton, R. E. Systematic Determination of the  
705 Packaging Limit of Lentiviral Vectors. *Hum Gene Ther* **12**, 1893–1905 (2001).
- 706 16. Sanson, K. R. *et al.* Optimized libraries for CRISPR-Cas9 genetic screens with multiple  
707 modalities. *Nat Commun* **9**, 5416 (2018).
- 708 17. Ding, S. *et al.* Efficient transposition of the piggyBac (PB) transposon in mammalian cells  
709 and mice. *Cell* **122**, 473–483 (2005).
- 710 18. Hazelbaker, D. Z. *et al.* A multiplexed gRNA piggyBac transposon system facilitates efficient  
711 induction of CRISPRi and CRISPRa in human pluripotent stem cells. *Sci Rep-uk* **10**, 635 (2020).
- 712 19. Li, S., Zhang, A., Xue, H., Li, D. & Liu, Y. One-Step piggyBac Transposon-Based  
713 CRISPR/Cas9 Activation of Multiple Genes. *Molecular therapy. Nucleic acids* **8**, 64–76 (2017).
- 714 20. Chong, Z.-S., Ohnishi, S., Yusa, K. & Wright, G. J. Pooled extracellular receptor-ligand  
715 interaction screening using CRISPR activation. *Genome Biol* **19**, 205 (2018).
- 716 21. Dang, Y. *et al.* Optimizing sgRNA structure to improve CRISPR-Cas9 knockout efficiency.  
717 *Genome Biol* **16**, 280 (2015).
- 718 22. Chen, B. *et al.* Dynamic Imaging of Genomic Loci in Living Human Cells by an Optimized  
719 CRISPR/Cas System. *Cell* **155**, 1479–1491 (2013).
- 720 23. Qin, J. Y. *et al.* Systematic Comparison of Constitutive Promoters and the Doxycycline-  
721 Inducible Promoter. *Plos One* **5**, e10611 (2010).



- 722 24. Chen, N. *et al.* KRAS mutation-induced upregulation of PD-L1 mediates immune escape in  
723 human lung adenocarcinoma. *Cancer Immunol Immunother* **66**, 1175–1187 (2017).
- 724 25. Dai, C. *et al.* Implication of combined PD-L1/PD-1 blockade with cytokine-induced killer cells  
725 as a synergistic immunotherapy for gastrointestinal cancer. *Oncotarget* **7**, 10332–10344 (2016).
- 726 26. Allen, D., Rosenberg, M. & Hendel, A. Using Synthetically Engineered Guide RNAs to  
727 Enhance CRISPR Genome Editing Systems in Mammalian Cells. *Frontiers Genome Ed* **2**,  
728 617910 (2021).
- 729 27. Strezoska, Ž. *et al.* CRISPR-mediated transcriptional activation with synthetic guide RNA. *J*  
730 *Biotechnol* **319**, 25–35 (2020).
- 731 28. Chandler, M., Panigaj, M., Rolband, L. A. & Afonin, K. A. Challenges in optimizing RNA  
732 nanostructures for large-scale production and controlled therapeutic properties. *Nanomedicine-*  
733 *uk* **15**, 1331–1340 (2020).
- 734 29. Hendel, A. *et al.* Chemically modified guide RNAs enhance CRISPR-Cas genome editing in  
735 human primary cells. *Nat Biotechnol* **33**, 985–989 (2015).
- 736 30. Zuker, M. Mfold web server for nucleic acid folding and hybridization prediction. *Nucleic*  
737 *Acids Res* **31**, 3406–3415 (2003).
